# Supplementary material
Source: PubMed Central journal article supplement (PMC6149435)
Supplement: kcam-12-03-1356554-s001.pdf [file kcam-12-03-1356554-s001.pdf]

**K<sup>+</sup> deficiency caused defects in renal tubular cell proliferation, oxidative stress response, tissue repair and tight junction integrity, but enhanced energy production, proteasome function and cellular K<sup>+</sup> uptake**

*Chompunoot Kapincharanon and Visith Thongboonkerd*

**Supplementary Table S1:** Compositions of ANK, ALK, and AKD in-house media.

| Components                       | Concentration (g/L)                                      |                                                       |                                                          |
|----------------------------------|----------------------------------------------------------|-------------------------------------------------------|----------------------------------------------------------|
|                                  | Normal K <sup>+</sup> (ANK)<br>(K <sup>+</sup> = 5.3 mM) | Low K <sup>+</sup> (ALK)<br>(K <sup>+</sup> = 2.5 mM) | K <sup>+</sup> depleted (AKD)<br>(K <sup>+</sup> = 0 mM) |
| <b>Inorganic salts</b>           |                                                          |                                                       |                                                          |
| Calcium chloride (anhydrate)     | 0.20000                                                  | 0.20000                                               | 0.20000                                                  |
| Magnesium sulfate (anhydrate)    | 0.09767                                                  | 0.09767                                               | 0.09767                                                  |
| Potassium chloride               | 0.40000                                                  | 0.18868                                               | 0.00000                                                  |
| Sodium bicarbonate               | 1.50000                                                  | 1.50000                                               | 1.50000                                                  |
| Sodium chloride                  | 6.80000                                                  | 6.80000                                               | 6.80000                                                  |
| Sodium Phosphate monobasic       | 0.14000                                                  | 0.14000                                               | 0.14000                                                  |
| <b>Amino acids</b>               |                                                          |                                                       |                                                          |
| <i>Essential amino acid</i>      |                                                          |                                                       |                                                          |
| (M-5550, Sigma Chemical)         |                                                          |                                                       |                                                          |
| L-Arginine.HCl                   | 0.12664                                                  | 0.12664                                               | 0.12664                                                  |
| L-Cystine.2HCl                   | 0.03128                                                  | 0.03128                                               | 0.03128                                                  |
| L-Glutamine                      | 0.29200                                                  | 0.29200                                               | 0.29200                                                  |
| L-Histidine.HCl.H <sub>2</sub> O | 0.04200                                                  | 0.04200                                               | 0.04200                                                  |
| L-Isoleucine                     | 0.05250                                                  | 0.05250                                               | 0.05250                                                  |
| L-Leucine                        | 0.05240                                                  | 0.05240                                               | 0.05240                                                  |
| L-Lysine.HCl                     | 0.07250                                                  | 0.07250                                               | 0.07250                                                  |
| L-Methionine                     | 0.01510                                                  | 0.01510                                               | 0.01510                                                  |
| L-Phenylalanine                  | 0.03300                                                  | 0.03300                                               | 0.03300                                                  |
| L-threonine                      | 0.04760                                                  | 0.04760                                               | 0.04760                                                  |
| L-Tryptophan                     | 0.01020                                                  | 0.01020                                               | 0.01020                                                  |
| L-Tyrosine                       | 0.05600                                                  | 0.05600                                               | 0.05600                                                  |
| L-Valine                         | 0.04680                                                  | 0.04680                                               | 0.04680                                                  |
| <i>Non-essential amino acids</i> |                                                          |                                                       |                                                          |
| (M-7145, Sigma Chemical)         |                                                          |                                                       |                                                          |
| L-Alanine                        | 0.00890                                                  | 0.00890                                               | 0.00890                                                  |
| L-Asparagine.H <sub>2</sub> O    | 0.01500                                                  | 0.01500                                               | 0.01500                                                  |
| L-Aspartic acid                  | 0.01330                                                  | 0.01330                                               | 0.01330                                                  |
| L-Glutamic acid                  | 0.01470                                                  | 0.01470                                               | 0.01470                                                  |
| L-Glycine                        | 0.00750                                                  | 0.00750                                               | 0.00750                                                  |
| L-Proline                        | 0.01150                                                  | 0.01150                                               | 0.01150                                                  |
| L-Serine                         | 0.01050                                                  | 0.01050                                               | 0.01050                                                  |
| <b>Vitamins</b>                  |                                                          |                                                       |                                                          |
| (M-6895, Sigma Chemical)         |                                                          |                                                       |                                                          |
| D-Ca Pantothenic acid            | 0.00100                                                  | 0.00100                                               | 0.00100                                                  |
| Choline chloride                 | 0.00100                                                  | 0.00100                                               | 0.00100                                                  |
| Folic acid                       | 0.00100                                                  | 0.00100                                               | 0.00100                                                  |
| i-Inositol                       | 0.00200                                                  | 0.00200                                               | 0.00200                                                  |
| Niacinamide                      | 0.00100                                                  | 0.00100                                               | 0.00100                                                  |
| Pyridoxal.HCl                    | 0.00100                                                  | 0.00100                                               | 0.00100                                                  |
| Riboflavin                       | 0.00010                                                  | 0.00010                                               | 0.00010                                                  |
| Thiamine.HCl                     | 0.00100                                                  | 0.00100                                               | 0.00100                                                  |
| <b>Other components</b>          |                                                          |                                                       |                                                          |
| D-Glucose                        | 1.00000                                                  | 1.00000                                               | 1.00000                                                  |
| Phenol red                       | 0.01000                                                  | 0.01000                                               | 0.01000                                                  |

**Supplementary Table S2:** Summary of the altered proteins involved in individual functional networks.

| GO biological process | Symbol                            | Protein name                                                                                                                                                                  | NCBI ID      |
|-----------------------|-----------------------------------|-------------------------------------------------------------------------------------------------------------------------------------------------------------------------------|--------------|
| Cell proliferation    | <i>ARHGDIA</i>                    | Rho GDP dissociation inhibitor (GDI) alpha                                                                                                                                    | gi 73964747  |
|                       | <i>CAPNS1</i>                     | Calpain small subunit 1                                                                                                                                                       | gi 4502565   |
|                       | <i>CAT</i>                        | Catalase                                                                                                                                                                      | gi 194216584 |
|                       | <i>FGD4</i>                       | FYVE, RhoGEF and PH domain-containing protein 4 (Actin filament-binding protein frabin) (FGD1-related F-actin-binding protein) (Zinc finger FYVE domain-containing protein 6) | gi 116241363 |
|                       | <i>GSTP1</i>                      | Glutathione S-transferase P (GST 7-7) (Chain 7) (GST class-pi)                                                                                                                | gi 73986963  |
|                       | <i>HSPB1</i>                      | Heat shock protein 1, beta isoform 1 (Heat shock 25 kDa protein)                                                                                                              | gi 73972966  |
|                       | <i>LGALS3</i>                     | Lectin, galactose binding, soluble 3                                                                                                                                          | gi 32363162  |
|                       | <i>LMNA</i>                       | Prelamin-A/C isoform A                                                                                                                                                        | gi 162287370 |
|                       | <i>MAPK1</i>                      | Mitogen-activated protein kinase 1-like                                                                                                                                       | gi 291406910 |
|                       | <i>PRDX3</i>                      | Thioredoxin-dependent peroxide reductase, mitochondrial precursor                                                                                                             | gi 27806083  |
|                       | <i>PRKAG1</i>                     | 5-AMP-activated protein kinase, gamma-1 subunit (AMPK gamma-1 chain) (AMPKg) isoform 3                                                                                        | gi 73996585  |
|                       | <i>PRKDC</i>                      | DNA-dependent protein kinase catalytic subunit                                                                                                                                | gi 255522855 |
|                       | <i>PSMA6</i>                      | Proteasome subunit alpha type 6 (Proteasome iota chain) (Macropain iota chain) (Multicatalytic endopeptidase complex iota chain) isoform 2                                    | gi 73962756  |
|                       | <i>PSMC2</i>                      | Proteasome 26S ATPase subunit 2                                                                                                                                               | gi 4506209   |
|                       | <i>YWHAE</i>                      | Epsilon isoform of 14-3-3 protein                                                                                                                                             | gi 149605465 |
| Cell death            | <i>ALB</i>                        | Serum albumin                                                                                                                                                                 | gi 28592     |
|                       | <i>ARHGDIA</i>                    | Rho GDP dissociation inhibitor (GDI) alpha                                                                                                                                    | gi 73964747  |
|                       | <i>CAT</i>                        | Catalase                                                                                                                                                                      | gi 194216584 |
|                       | <i>EEF2</i>                       | Elongation factor 2 (EF-2)                                                                                                                                                    | gi 291399590 |
|                       | <i>EIF5A</i>                      | Eukaryotic translation initiation factor 5A-1-like                                                                                                                            | gi 297699875 |
|                       | <i>HBB</i>                        | Beta-globin                                                                                                                                                                   | gi 73982819  |
|                       | <i>HSP90AB1</i>                   | Chaperone protein HSP90 beta                                                                                                                                                  | gi 9082289   |
|                       | <i>HSPB1</i>                      | Heat shock protein 1, beta isoform 1 (Heat shock 25 kDa protein)                                                                                                              | gi 73972966  |
|                       | <i>HSPE1</i>                      | Chaperonin 10, cpn10                                                                                                                                                          | gi 73999070  |
|                       | <i>KRT8</i>                       | Keratin, type II cytoskeletal 8 (Cytokeratin 8) (K8) (CK 8)                                                                                                                   | gi 73996455  |
|                       | <i>LMNA</i>                       | Prelamin-A/C isoform A                                                                                                                                                        | gi 162287370 |
|                       | <i>MPO</i>                        | Myeloperoxidase                                                                                                                                                               | gi 114669606 |
|                       | <i>P4HB</i>                       | Prolyl 4-hydroxylase, beta subunit                                                                                                                                            | gi 73964749  |
|                       | <i>PRDX3</i>                      | Thioredoxin-dependent peroxide reductase, mitochondrial precursor                                                                                                             | gi 74008772  |
|                       | <i>PRKDC</i>                      | DNA-dependent protein kinase catalytic subunit                                                                                                                                | gi 255522855 |
|                       | <i>PSMA6</i>                      | Proteasome subunit alpha type 6 (Proteasome iota chain) (Macropain iota chain) (Multicatalytic endopeptidase complex iota chain) isoform 2                                    | gi 73962756  |
|                       | <i>PSMC2</i>                      | Proteasome 26S ATPase subunit 2                                                                                                                                               | gi 4506209   |
| <i>YWHAE</i>          | Epsilon isoform of 14-3-3 protein | gi 149605465                                                                                                                                                                  |              |
| Oxidative stress      | <i>CAT</i>                        | Catalase                                                                                                                                                                      | gi 194216584 |
|                       | <i>GSTP1</i>                      | Glutathione S-transferase P (GST 7-7) (Chain 7) (GST class-pi)                                                                                                                | gi 73986963  |
|                       | <i>HBB</i>                        | Beta-globin                                                                                                                                                                   | gi 73982819  |
|                       | <i>HSP90AB1</i>                   | Chaperone protein HSP90 beta                                                                                                                                                  | gi 9082289   |
|                       | <i>MAPK1</i>                      | Mitogen-activated protein kinase 1-like                                                                                                                                       | gi 291406910 |
|                       | <i>MPO</i>                        | Myeloperoxidase                                                                                                                                                               | gi 114669606 |

|                |                 |                                                                                                                                         |              |
|----------------|-----------------|-----------------------------------------------------------------------------------------------------------------------------------------|--------------|
|                | <i>PRDX1</i>    | Peroxioredoxin-1                                                                                                                        | gi 4505591   |
|                | <i>PRDX3</i>    | Thioredoxin-dependent peroxide reductase, mitochondrial precursor                                                                       | gi 74008772  |
|                | <i>PRDX6</i>    | Peroxioredoxin-6                                                                                                                        | gi 3219774   |
|                | <i>PRKAG1</i>   | 5-AMP-activated protein kinase, gamma-1 subunit (AMPK gamma-1 chain) (AMPK $\gamma$ ) isoform 3                                         | gi 73996585  |
|                | <i>PRKDC</i>    | DNA-dependent protein kinase catalytic subunit                                                                                          | gi 255522855 |
| Tissue repair  | <i>ATPIA1</i>   | Sodium/potassium-transporting ATPase subunit alpha-1                                                                                    | gi 237681111 |
|                | <i>CAPG</i>     | Macrophage capping protein (Actin-regulatory protein CAP-G)                                                                             | gi 73980918  |
|                | <i>CORO1B</i>   | Coronin, actin binding protein, 1B isoform 1                                                                                            | gi 73987435  |
|                | <i>DNAH17</i>   | Dynein heavy chain 17, axonemal (Ciliary dynein heavy chain 17)                                                                         | gi 57036583  |
|                | <i>DNAH6</i>    | Dynein, axonemal, heavy chain 6 (Cytoplasm, cytoskeleton, cilium axoneme)                                                               | gi 293346874 |
|                | <i>DNAH9</i>    | Dynein, axonemal, heavy polypeptide 9 isoform 2                                                                                         | gi 109491006 |
|                | <i>EZR</i>      | Ezrin                                                                                                                                   | gi 50881     |
|                | <i>HSP90AB1</i> | Chaperone protein HSP90 beta                                                                                                            | gi 9082289   |
|                | <i>HSPB1</i>    | Heat shock protein 1, beta isoform 1 (Heat shock 25 kDa protein)                                                                        | gi 73972966  |
|                | <i>KIF14</i>    | Kinesin family member 14                                                                                                                | gi 291402681 |
|                | <i>LMNA</i>     | Prelamin-A/C isoform A                                                                                                                  | gi 162287370 |
|                | <i>MAPK1</i>    | Mitogen-activated protein kinase 1-like                                                                                                 | gi 291406910 |
|                | <i>PLAT</i>     | Tissue-type plasminogen activator-like                                                                                                  | gi 334312618 |
|                | <i>PPIA</i>     | Peptidylprolyl isomerase A (cyclophilin A)                                                                                              | gi 303227965 |
|                | <i>YWHAE</i>    | Epsilon isoform of 14-3-3 protein                                                                                                       | gi 149605465 |
| Cell integrity | <i>ACAA2</i>    | 3-ketoacyl-CoA thiolase, mitochondrial                                                                                                  | gi 74222010  |
|                | <i>ADSL</i>     | Adenylosuccinate lyase isoform 1                                                                                                        | gi 73969028  |
|                | <i>ALDH5A1</i>  | Succinate-semialdehyde dehydrogenase                                                                                                    | gi 262042869 |
|                | <i>ARHGDI3</i>  | Rho GDP dissociation inhibitor (GDI) alpha                                                                                              | gi 73964747  |
|                | <i>ATPIA1</i>   | Sodium/potassium-transporting ATPase subunit alpha-1                                                                                    | gi 237681111 |
|                | <i>CAPNS1</i>   | Calpain small subunit 1                                                                                                                 | gi 4502565   |
|                | <i>CAT</i>      | Catalase                                                                                                                                | gi 194216584 |
|                | <i>CCT2</i>     | Chaperonin containing TCP1, subunit 2 isoform 1                                                                                         | gi 73968673  |
|                | <i>CORO1B</i>   | Coronin, actin binding protein, 1B isoform 1                                                                                            | gi 73987435  |
|                | <i>DNAH17</i>   | Dynein heavy chain 17, axonemal (Ciliary dynein heavy chain 17)                                                                         | gi 194216584 |
|                | <i>DNAH6</i>    | Dynein, axonemal, heavy chain 6                                                                                                         | gi 293346874 |
|                | <i>DNAH9</i>    | Dynein, axonemal, heavy polypeptide 9 isoform 2                                                                                         | gi 109491006 |
|                | <i>EIF3I</i>    | Eukaryotic translation initiation factor 3 subunit 2 (eIF-3 beta) (eIF3 p36) (eIF3i) (TGF-beta receptor interacting protein 1) (TRIP-1) | gi 163140875 |
|                | <i>EIF3K</i>    | Eukaryotic translation initiation factor 3, subunit 12 isoform 1                                                                        | gi 60360400  |
|                | <i>FGD4</i>     | Synaptotagmin-like 3 (Exophilin-6)                                                                                                      | gi 297467751 |
|                | <i>GLS</i>      | Glutaminase C isoform 3                                                                                                                 | gi 114582297 |
|                | <i>HBB</i>      | Beta-globin                                                                                                                             | gi 73982819  |
|                | <i>HSP90AB1</i> | Chaperone protein HSP90 beta                                                                                                            | gi 9082289   |
|                | <i>KRT8</i>     | Keratin, type II cytoskeletal 8 (Cytokeratin 8) (K8) (CK 8)                                                                             | gi 73996455  |
|                | <i>LGALS3</i>   | Lectin, galactose binding, soluble 3                                                                                                    | gi 32363162  |
|                | <i>LMNA</i>     | Prelamin-A/C isoform A                                                                                                                  | gi 162287370 |
|                | <i>MAPK1</i>    | Mitogen-activated protein kinase 1-like                                                                                                 | gi 291406910 |
|                | <i>MMP13</i>    | collagenase 3 preproprotein (Matrix metalloproteinase 13 preproprotein)                                                                 | gi 4505209   |
|                | <i>OAT</i>      | Ornithine aminotransferase, mitochondrial precursor                                                                                     | gi 73998800  |

|                     |                 |                                                                                                                                            |                                |
|---------------------|-----------------|--------------------------------------------------------------------------------------------------------------------------------------------|--------------------------------|
|                     | <i>P4HB</i>     | (Ornithine--oxo-acid aminotransferase) isoform 1<br>Prolyl 4-hydroxylase, beta subunit                                                     | gi 73964749                    |
|                     | <i>PLEC</i>     | Plectin 1 isoform 1 isoform 1                                                                                                              | gi 73974726                    |
|                     | <i>PPIA</i>     | Peptidylprolyl isomerase A (cyclophilin A) [Bos taurus]                                                                                    | gi 303227965                   |
|                     | <i>PRDX3</i>    | Thioredoxin-dependent peroxide reductase, mitochondrial precursor                                                                          | gi 74008772                    |
|                     | <i>PRKAG1</i>   | 5-AMP-activated protein kinase, gamma-1 subunit (AMPK gamma-1 chain) (AMPKg) isoform 3                                                     | gi 73996585                    |
|                     | <i>PRKDC</i>    | DNA-dependent protein kinase catalytic subunit                                                                                             | gi 255522855                   |
|                     | <i>RPS12</i>    | 40S ribosomal protein S12                                                                                                                  | gi 14277700                    |
|                     | <i>TWF1</i>     | Twinfilin isoform 1 isoform 1                                                                                                              | gi 149605465                   |
|                     | <i>YWHAE</i>    | Epsilon isoform of 14-3-3 protein                                                                                                          | gi 149605465                   |
| ATP production      | <i>AK2</i>      | Adenylate kinase 2 isoform b isoform 2                                                                                                     | gi 73949913                    |
|                     | <i>ALDH5A1</i>  | Succinate-semialdehyde dehydrogenase                                                                                                       | gi 262042869                   |
|                     | <i>ATP5H</i>    | ATP synthase subunit d, mitochondrial-like                                                                                                 | gi 57108097                    |
|                     | <i>DNAH17</i>   | Dynein heavy chain 17, axonemal (Ciliary dynein heavy chain 17)                                                                            | gi 57036583                    |
|                     | <i>DNAH6</i>    | Dynein, axonemal, heavy chain 6                                                                                                            | gi 293346874                   |
|                     | <i>DNAH9</i>    | Dynein, axonemal, heavy polypeptide 9 isoform 2                                                                                            | gi 109491006                   |
|                     | <i>ENO1</i>     | Alpha enolase (2-phospho-D-glycerate hydrolyase)(NNE)(Enolase 1) (Phosphopyruvate hydratase)                                               | gi 73953207                    |
|                     | <i>IDH3A</i>    | NAD+-isocitrate dehydrogenase, alpha subunit                                                                                               | gi 73994237                    |
|                     | <i>NDUFA10</i>  | NADH dehydrogenase (ubiquinone) 1 alpha subcomplex, 10, 42kDa precursor                                                                    | gi 297301779<br>(gi 163140875) |
|                     | <i>PGAM1</i>    | Phosphoglycerate mutase 1 (Phosphoglycerate mutase isozyme B) (PGAM-B) (BPG-dependent PGAM 1) isoform 1                                    | gi 114632195                   |
|                     | <i>PSMC2</i>    | 26S protease regulatory subunit 7                                                                                                          | gi 4506209                     |
|                     | <i>TPI1</i>     | Triosephosphate isomerase                                                                                                                  | gi 308082020                   |
|                     | <i>UQCRC1</i>   | Ubiquinol-cytochrome c reductase core protein I isoform 2                                                                                  | gi 73985642                    |
| Proteasome function | <i>PSMA6</i>    | Proteasome subunit alpha type 6 (Proteasome iota chain) (Macropain iota chain) (Multicatalytic endopeptidase complex iota chain) isoform 2 | gi 73962756                    |
|                     | <i>PSMC2</i>    | Proteasome 26S ATPase subunit 2                                                                                                            | gi 4506209                     |
| Ion transport       | <i>ALB</i>      | Serum albumin                                                                                                                              | gi 28592                       |
|                     | <i>ATP1A1</i>   | Sodium/potassium-transporting ATPase subunit alpha-1                                                                                       | gi 237681111                   |
|                     | <i>GLS</i>      | Glutaminase C isoform 3                                                                                                                    | gi 114582297                   |
|                     | <i>HBB</i>      | Beta-globin                                                                                                                                | gi 73982819                    |
|                     | <i>HSP90AB1</i> | Chaperone protein HSP90 beta                                                                                                               | gi 9082289                     |
|                     | <i>MAPK1</i>    | Mitogen-activated protein kinase 1-like                                                                                                    | gi 291406910                   |
|                     | <i>PPIA</i>     | Peptidylprolyl isomerase A (cyclophilin A) [Bos taurus]                                                                                    | gi 28189246                    |
|                     | <i>PRDX1</i>    | Peroxiredoxin-1                                                                                                                            | gi 4505591                     |
|                     | <i>UQCRC1</i>   | Ubiquinol-cytochrome c reductase core protein I isoform 2                                                                                  | gi 73985642                    |
|                     | <i>YWHAE</i>    | Epsilon isoform of 14-3-3 protein                                                                                                          | gi 149605465                   |
